# Supplementary material for: Predictors of abatacept retention over 2 years in patients with rheumatoid arthritis: results from the real-world ACTION study
Source: Springer Nature journal article supplement (doi:10.1007/s10067-019-04449-w), 2019-02-21
Supplement: MOESM1 [file 16497460]

## Electronic supplementary material

### **Predictors of abatacept retention over 2 years in patients with rheumatoid arthritis: results from the real-world ACTION study**

Rieke Alten, Xavier Mariette, Hanns-Martin Lorenz, Hubert Nüßlein, Mauro Galeazzi, Federico Navarro, Melanie Chartier, Julia Heitzmann, Coralie Poncet, Christiane Rauch, Manuela Le Bars

Journal: *Clinical Rheumatology*

Correspondence to:

Professor Rieke Alten, MD, PhD

Department of Internal Medicine, Rheumatology, Clinical Immunology and Osteology

Schlosspark-Klinik University Medicine Berlin

E-mail: [rieke.alten@schlosspark-klinik.de](mailto:rieke.alten@schlosspark-klinik.de)

**Table S1** Patient characteristics tested in the univariable analyses

**A** Variables entered into the model for biologic-naïve patients

| <b>Variable</b>                                                                       |
|---------------------------------------------------------------------------------------|
| <b>Sociodemographics</b>                                                              |
| Age                                                                                   |
| Sex                                                                                   |
| BMI                                                                                   |
| Country                                                                               |
| <b>Disease characteristics</b>                                                        |
| Disease duration, years                                                               |
| Tender joint count (28)                                                               |
| Swollen joint count (28)                                                              |
| HAQ-DI                                                                                |
| Physician Global Assessment of disease activity, VAS 100 mm                           |
| Patient Global Assessment of disease activity, VAS 100 mm                             |
| Patient Global Assessment of pain, VAS 100 mm                                         |
| Erythrocyte sedimentation rate (after 1 hour)                                         |
| DAS28 (ESR, otherwise CRP)                                                            |
| CDAI (calculated)                                                                     |
| SDAI (calculated)                                                                     |
| Radiographic erosion                                                                  |
| RF status                                                                             |
| Anti-CCP status                                                                       |
| RF and anti-CCP double positivity                                                     |
| <b>Co-morbidities</b>                                                                 |
| Cardiac disorders                                                                     |
| Bronchospasm and obstruction                                                          |
| Diabetes mellitus                                                                     |
| Tobacco use                                                                           |
| Infections and infestations                                                           |
| <b>Previous treatments</b>                                                            |
| Number of prior cDMARDs (excluding corticosteroids)                                   |
| Abatacept as monotherapy or in combination with MTX ( $\pm$ cDMARDs) or other cDMARDs |
| Corticosteroids at baseline                                                           |

## B Variables entered into the model for biologic-failure patients

---

### Variable

---

#### **Sociodemographics**

Age

Sex

BMI

Country

#### **Disease characteristics**

Disease duration, years

Tender joint count (28)

Swollen joint count (28)

HAQ-DI

Physician Global Assessment of disease activity, VAS 100 mm

Patient Global Assessment of disease activity, VAS 100 mm

Patient Global Assessment of pain, VAS 100 mm

Erythrocyte sedimentation rate (after 1 hour)

DAS28 (ESR, otherwise CRP)

CDAI (calculated)

SDAI (calculated)

Radiographic erosion

RF status

Anti-CCP status

RF and anti-CCP double positivity

#### **Co-morbidities**

Cardiac disorders

Bronchospasm and obstruction

Diabetes mellitus

Tobacco use

Infections and infestations

#### **Previous treatments**

Number of prior cDMARDs (excluding corticosteroids)

Type of last biologic before abatacept initiation

Rituximab as last treatment before abatacept initiation

≥2 previous TNFis

Reason for stopping last biologic

**Concomitant treatment**

Abatacept as monotherapy or in combination with MTX ( $\pm$ cDMARDs) or other cDMARDs  
Corticosteroids at baseline

---

anti-CCP: anti-cyclic citrullinated peptide; BMI: body mass index; CDAI: Clinical Disease Activity Index; cDMARD: conventional disease-modifying anti-rheumatic drug; CRP: C-reactive protein; DAS28: 28-joint Disease Activity Score; ESR: erythrocyte sedimentation rate; HAQ-DI: Health Assessment Questionnaire-Disability Index; MTX: methotrexate; RF: rheumatoid factor; SDAI: Simplified Disease Activity Index; TNFi: tumour necrosis factor inhibitor.

**Fig. S1 ACTION study design**

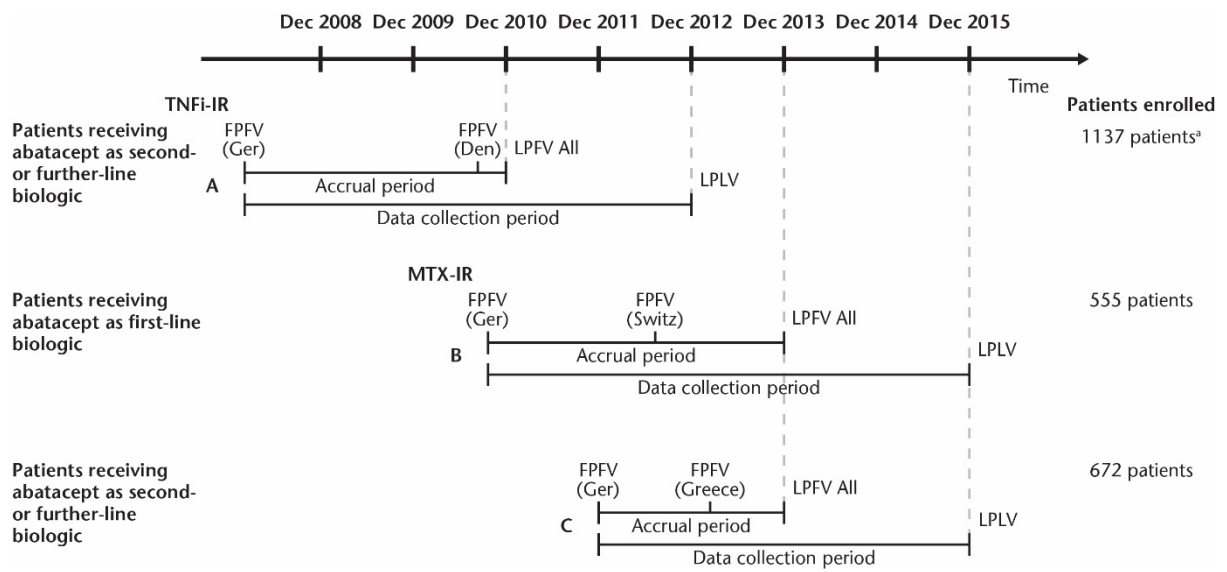

<sup>a</sup>Includes a mix of patients treated with biologic agents as first- and second-line or above therapy.

Den: Denmark; MTX: methotrexate; FPFV: first patient first visit; Ger: Germany; IR: inadequate responder; LPLV: last patient last visit; LPLV: last patient last visit; MTX: methotrexate; TNFi: tumour necrosis factor inhibitor; Switz: Switzerland.
